# Supplementary material
Source: ML conference proceedings conference paper supplement (https://proceedings.neurips.cc/paper_files/paper/2010/hash/5487315b1286f907165907aa8fc96619-Abstract.html)
Supplement: Supplementary file [file 5487315b1286f907165907aa8fc96619-Supplemental.zip]

---

# Supplemental Material of “Active Learning by Querying Informative and Representative Examples”

---

Sheng-Jun Huang<sup>1</sup>

Rong Jin<sup>2</sup>

Zhi-Hua Zhou<sup>1</sup>

<sup>1</sup>National Key Laboratory for Novel Software Technology,  
Nanjing University, Nanjing 210093, China

<sup>2</sup>Department of Computer Science and Engineering,  
Michigan State University, East Lansing, MI 48824

{huangsj, zhouzh}@lamda.nju.edu.cn      rongjin@cse.msu.edu

## The Connection between Eq. 2 and Eq. 3

In this section, we try to establish the connection between Eq. 2 and Eq. 3, i.e., the connection between

$$s^* = \arg \min_{n_l < s \leq n} |f^*(\mathbf{x}_s)|$$

and

$$s^* = \arg \min_{n_1 < s \leq n} \mathcal{L}(\mathcal{D}_l, \mathbf{x}_s),$$

where

$$\mathcal{L}(\mathcal{D}_l, \mathbf{x}_s) = \max_{y_s = \pm 1} \min_{f \in \mathcal{H}} \frac{\lambda}{2} |f|_{\mathcal{H}}^2 + \sum_{i=1}^{n_l} \ell(y_i, f(\mathbf{x}_i)) + \ell(y_s, f(\mathbf{x}_s)).$$

*Proof.* Denote by  $\mathcal{J}(f)$  the object function, i.e.,

$$\mathcal{J}(f) = \frac{\lambda}{2} |f|_{\mathcal{H}}^2 + \sum_{i=1}^{n_l} \ell(y_i, f(\mathbf{x}_i)),$$

We have

$$\begin{aligned} s^* &= \arg \min_{n_l < s \leq n} |f^*(\mathbf{x}_s)| \\ &= \arg \min_{n_l < s \leq n} \min_{f \in \mathcal{H}; f: \mathcal{J}(f) \leq \mathcal{J}(f^*)} |f(\mathbf{x}_s)| \\ &= \arg \min_{n_l < s \leq n} \min_{f \in \mathcal{H}} |f(\mathbf{x}_s)| + C\mathcal{J}(f) \\ &= \arg \min_{n_l < s \leq n} \max_{y_s = \pm 1} \min_{f \in \mathcal{H}} \ell(y_s, f(\mathbf{x}_s)) + C\mathcal{J}(f) \\ &= \arg \min_{n_l < s \leq n} \max_{y_s = \pm 1} \min_{f \in \mathcal{H}} C \left( \frac{\lambda}{2} |f|_{\mathcal{H}}^2 + \sum_{i=1}^{n_l} \ell(y_i, f(\mathbf{x}_i)) \right) + \ell(y_s, f(\mathbf{x}_s)) \end{aligned}$$

Let  $C = 1$ , we have

$$s^* = \arg \min_{n_1 < s \leq n} \mathcal{L}(\mathcal{D}_l, \mathbf{x}_s)$$

□

## Proof of Theorem 1

**Theorem 1.** *Let*

$$L_{a,a}^{-1} = \begin{pmatrix} L_{s,s} & L_{s,u} \\ L_{u,s} & L_{u,u} \end{pmatrix}^{-1} = \begin{pmatrix} a & -\mathbf{b}^\top \\ -\mathbf{b} & D \end{pmatrix}.$$

*We have*

$$L_{u,u}^{-1} = D - \frac{1}{a} \mathbf{b} \mathbf{b}^\top.$$

*Proof.* Using the matrix inversion lemma, we have

$$L_{a,a}^{-1} = \begin{pmatrix} L_{s,s} & L_{s,u} \\ L_{u,s} & L_{u,u} \end{pmatrix}^{-1} = \begin{pmatrix} a & -\mathbf{b}^\top \\ -\mathbf{b} & D \end{pmatrix} = \begin{pmatrix} C_1^{-1} & -\frac{1}{L_{s,s}} L_{u,s}^\top C_2^{-1} \\ -\frac{1}{L_{s,s}} C_2^{-1} L_{u,s} & C_2^{-1} \end{pmatrix}$$

where  $C_1 = L_{s,s} - L_{u,s}^\top L_{u,u}^{-1} L_{u,s}$ ,  $C_2 = L_{u,u} - \frac{1}{L_{s,s}} L_{u,s} L_{u,s}^\top$ .

With the equation above, we can express  $a$ ,  $\mathbf{b}$  and  $D$  in terms of  $L$  as follows:

$$\begin{aligned} \frac{1}{a} &= C_1 = L_{s,s} - L_{u,s}^\top L_{u,u}^{-1} L_{u,s} \\ D &= C_2^{-1} = \left( L_{u,u} - \frac{1}{L_{s,s}} L_{u,s} L_{u,s}^\top \right)^{-1} \\ &= L_{u,u}^{-1} + L_{u,u}^{-1} L_{u,s} (L_{s,s} - L_{u,s}^\top L_{u,u}^{-1} L_{u,s})^{-1} L_{u,s}^\top L_{u,u}^{-1} \\ &= L_{u,u}^{-1} + a L_{u,u}^{-1} L_{u,s} L_{u,s}^\top L_{u,u}^{-1} \\ \mathbf{b} &= \frac{1}{L_{s,s}} C_2^{-1} L_{u,s} = \frac{1 + a L_{u,s}^\top L_{u,u}^{-1} L_{u,s}}{L_{s,s}} L_{u,u}^{-1} L_{u,s} = a L_{u,u}^{-1} L_{u,s} \end{aligned}$$

We complete the proof by combining the above relationships. □

## Data set information

Table 1: Data set information. *Size*: the number of instances. *Feature*: the number of features.

| <i>Data</i>   | <i>Size</i> | <i>Feature</i> | <i>Data</i>       | <i>Size</i> | <i>Feature</i> | <i>Data</i>       | <i>Size</i> | <i>Feature</i> |
|---------------|-------------|----------------|-------------------|-------------|----------------|-------------------|-------------|----------------|
| <i>austra</i> | 690         | 14             | <i>titato</i>     | 958         | 9              | <i>letterEvsF</i> | 1543        | 16             |
| <i>digit1</i> | 1500        | 241            | <i>vehicle</i>    | 435         | 18             | <i>letterIvsJ</i> | 1502        | 16             |
| <i>g241n</i>  | 1500        | 241            | <i>wdbc</i>       | 569         | 30             | <i>letterMvsN</i> | 1575        | 16             |
| <i>isolet</i> | 600         | 617            | <i>letterDvsP</i> | 1608        | 16             | <i>letterUvsV</i> | 1577        | 16             |

## Wilcoxon signed ranks test result

Table 2 summarizes the win/tie/loss counts of QUIRE versus the other methods based on Wilcoxon signed ranks test at 95% significance level. We observe that the results are almost as same as that based on paired  $t$ -tests.

## Computational cost

All the experiments are performed with MATLAB 7.6 on a 3.00GHZ Intel(R) Core(TM)2 DUO PC running Windows 7 with 4GB main memory, average CPU time in seconds of each round for all the six approaches on average of each data set is reported in Table 3.

Table 2: Win/tie/loss counts of QUIRE versus the other methods with varied numbers of queries based on Wilcoxon signed ranks test at 95% significance level.

| Algorithms | Number of queries (percentage of the unlabeled data) |         |         |         |         |         |         | In All     |
|------------|------------------------------------------------------|---------|---------|---------|---------|---------|---------|------------|
|            | 5%                                                   | 10%     | 20%     | 30%     | 40%     | 50%     | 80%     |            |
| RANDOM     | 4/8/0                                                | 7/5/0   | 9/3/0   | 8/3/1   | 10/2/0  | 9/3/0   | 7/5/0   | 54/29/1    |
| MARGIN     | 8/4/0                                                | 4/7/1   | 3/7/2   | 2/8/2   | 0/10/2  | 0/11/1  | 0/12/0  | 17/59/8    |
| CLUSTER    | 6/6/0                                                | 8/4/0   | 8/4/0   | 11/1/0  | 8/4/0   | 6/6/0   | 2/10/0  | 49/35/0    |
| IDE        | 5/7/0                                                | 7/4/1   | 6/5/1   | 7/5/0   | 8/3/1   | 8/4/0   | 3/9/0   | 44/37/3    |
| DUAL       | 7/5/0                                                | 10/2/0  | 11/1/0  | 11/1/0  | 11/1/0  | 11/1/0  | 9/3/0   | 70/14/0    |
| In All     | 30/30/0                                              | 36/22/2 | 37/20/3 | 39/18/3 | 37/20/3 | 34/25/1 | 21/39/0 | 234/174/12 |

Table 3: Average CPU time in seconds of each round for compared methods

| Data       | Algorithms |        |         |        |        |        |
|------------|------------|--------|---------|--------|--------|--------|
|            | RANDOM     | MARGIN | CLUSTER | IDE    | DUAL   | QUIRE  |
| austra     | 0.0001     | 0.0173 | 0.0072  | 0.0265 | 2.0109 | .1880  |
| digit1     | 0.0002     | 0.2018 | 0.0109  | 0.0435 | 9.3486 | 3.3787 |
| g241n      | 0.0002     | 0.3955 | 0.0198  | 0.0725 | 6.6166 | 3.3816 |
| isolet     | 0.0001     | 0.0686 | 0.0059  | 0.0284 | 7.9308 | 0.1445 |
| titato     | 0.0001     | 0.0310 | 0.0085  | 0.0335 | 1.8330 | 0.8326 |
| vehicle    | 0.0001     | 0.0057 | 0.0048  | 0.0176 | 0.1845 | 0.0535 |
| wdbc       | 0.0001     | 0.0070 | 0.0053  | 0.0224 | 0.5171 | 0.1313 |
| letterDvsP | 0.0002     | 0.0311 | 0.0131  | 0.0405 | 5.1526 | 3.7448 |
| letterEvsF | 0.0002     | 0.0331 | 0.0120  | 0.0395 | 1.1038 | 4.2273 |
| letterIvsJ | 0.0002     | 0.0470 | 0.0135  | 0.0424 | 1.6074 | 3.6689 |
| letterMvsN | 0.0002     | 0.0417 | 0.0121  | 0.0442 | 4.5766 | 3.5365 |
| letterUvsV | 0.0002     | 0.0275 | 0.0118  | 0.0415 | 4.7951 | 4.6030 |
| Average    | 0.0002     | 0.0756 | 0.0104  | 0.0377 | 3.8064 | 2.3242 |

## Experiment of Active Learning with A Few Initially Labeled Examples

In this experiment, we consider two settings: in the first setting, only one positive example and one negative example are available at the beginning of active learning; in the second setting, we increase the number of initially labeled examples to ten, with five positive examples and five negative examples. Figures 1 and 2 show the classification accuracy of the proposed algorithm and the baseline methods for these two settings, respectively. First, we observe that for most of the cases, the proposed algorithm still outperforms the baseline methods, even though the advantage of the proposed algorithm starts to diminish as more and more initially labeled examples are available. Second, we observe that the DUAL approach, which performs poorly when no initially labeled examples are available, is able to improve its performance significantly for some data sets.

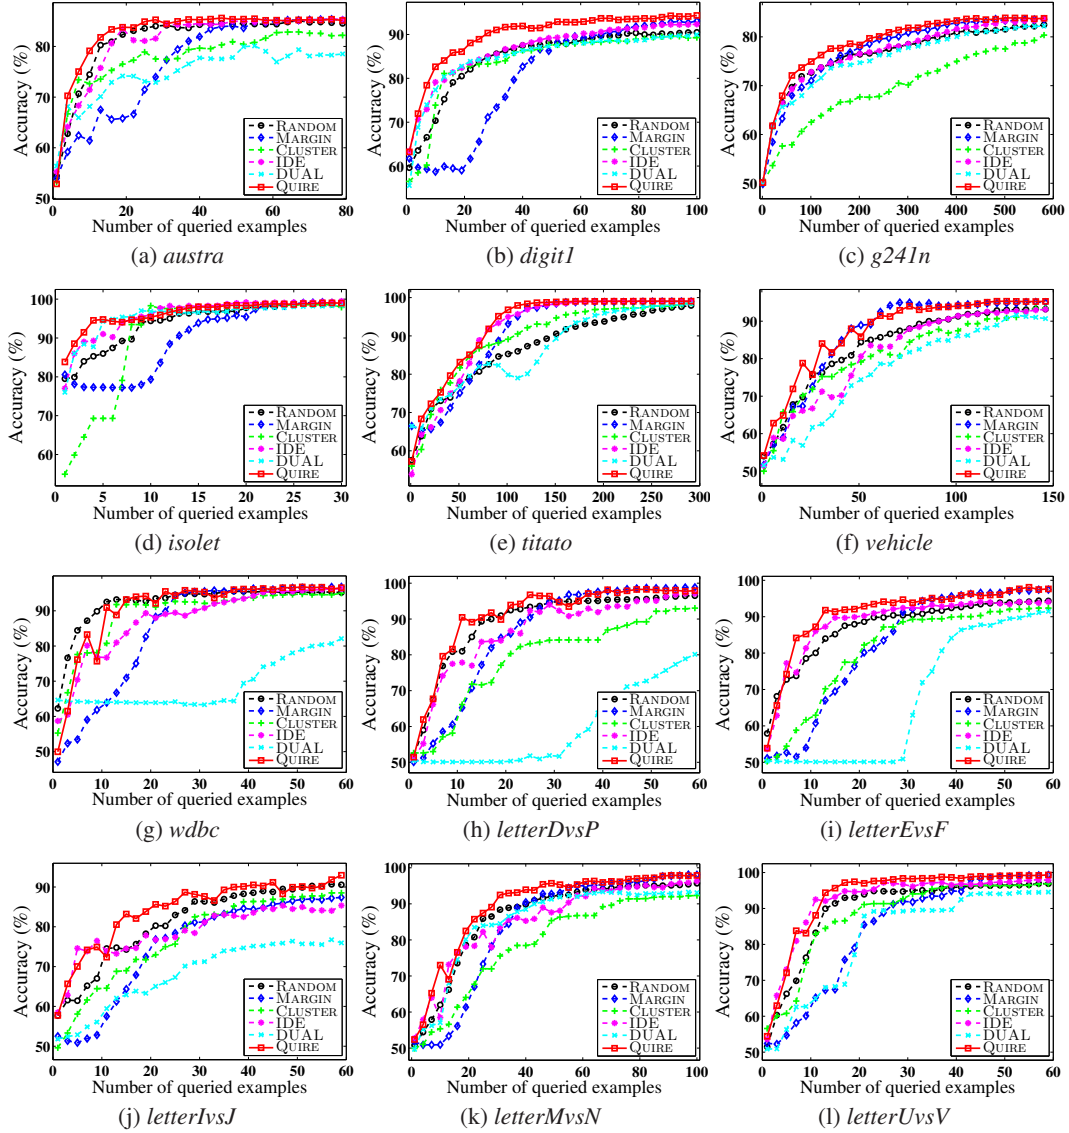

Figure 1: Comparison on classification accuracy with 2 initially labeled examples

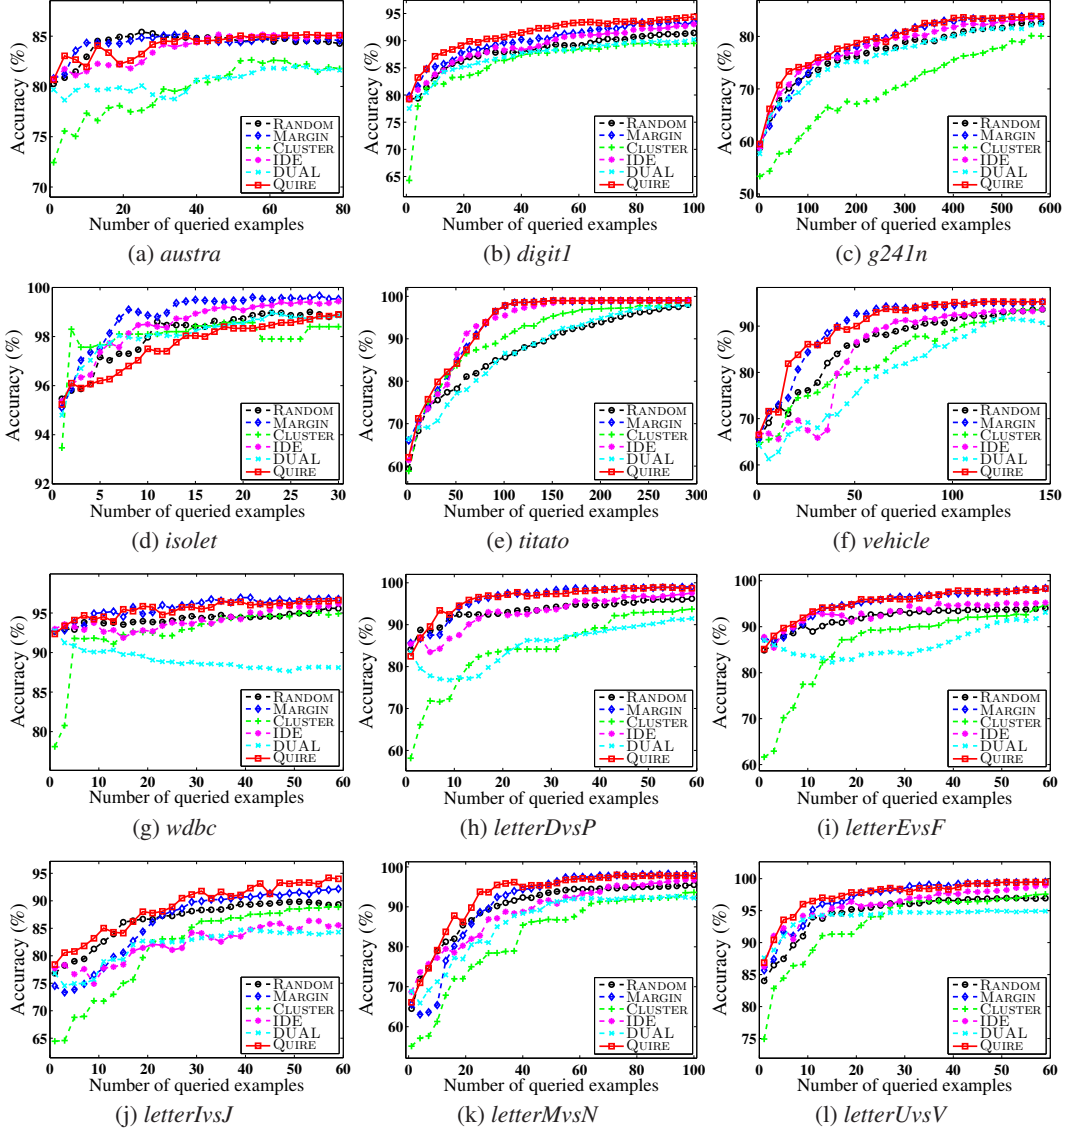

Figure 2: Comparison on classification accuracy with 10 initially labeled examples
